# Supplementary material for: Novel Ti–O–Ti bonding species constructed in a metal-oxide cluster
Source: Royal Society of Chemistry journal article supplement (doi:10.1039/b508738d), 2005-01-01
Supplement: b508738d.pdf [file b508738d.pdf]

## **Novel Ti-O-Ti Bonding Species Constructed in a Metal-Oxide Cluster**

**Kunihiko Hayashi, Mizuto Takahashi and Kenji Nomiya\***

*Department of Materials Science, Faculty of Science, Kanagawa University, Hiratsuka, Kanagawa 259-1293, Japan. E-mail: nomiya@chem.kanagawa-u.ac.jp*

### **Contents:**

**Fig. S1** Temperature-dependent  $^{31}\text{P}$  NMR of **1** in  $\text{D}_2\text{O}$ : (a) at 23.7 °C, (b) at 39.7 °C, (c) at 58.9 °C, (d) at 79.7 °C, and (e) the solution of (d) remeasured at 24.7 °C.

**Fig. S2** pH-Varied  $^{31}\text{P}$  NMR of **1** in  $\text{H}_2\text{O}$  at room temperature. The pH values of the solutions were adjusted by using aqueous KOH solution: (a) the aqueous solution of 1.0 g of **1** dissolved in 20 mL water, which showed pH = 1.77, (b) the solution (a) was adjusted to pH 2.5 by adding the KOH solution, (c) the solution (b) was adjusted to pH 1.5, (d) the solution (c) was adjusted to pH 0.5.

**Table S1** All bond distances (Å) and angles (°) for POM **1a**

**Table S2** Average bond distances (Å) and angles (°) [range] for the Keggin POM moiety in **1a**

**Table S3** Bond valence sum (BVS) calculations of W(1-11), Ti(1-2), P and O atoms

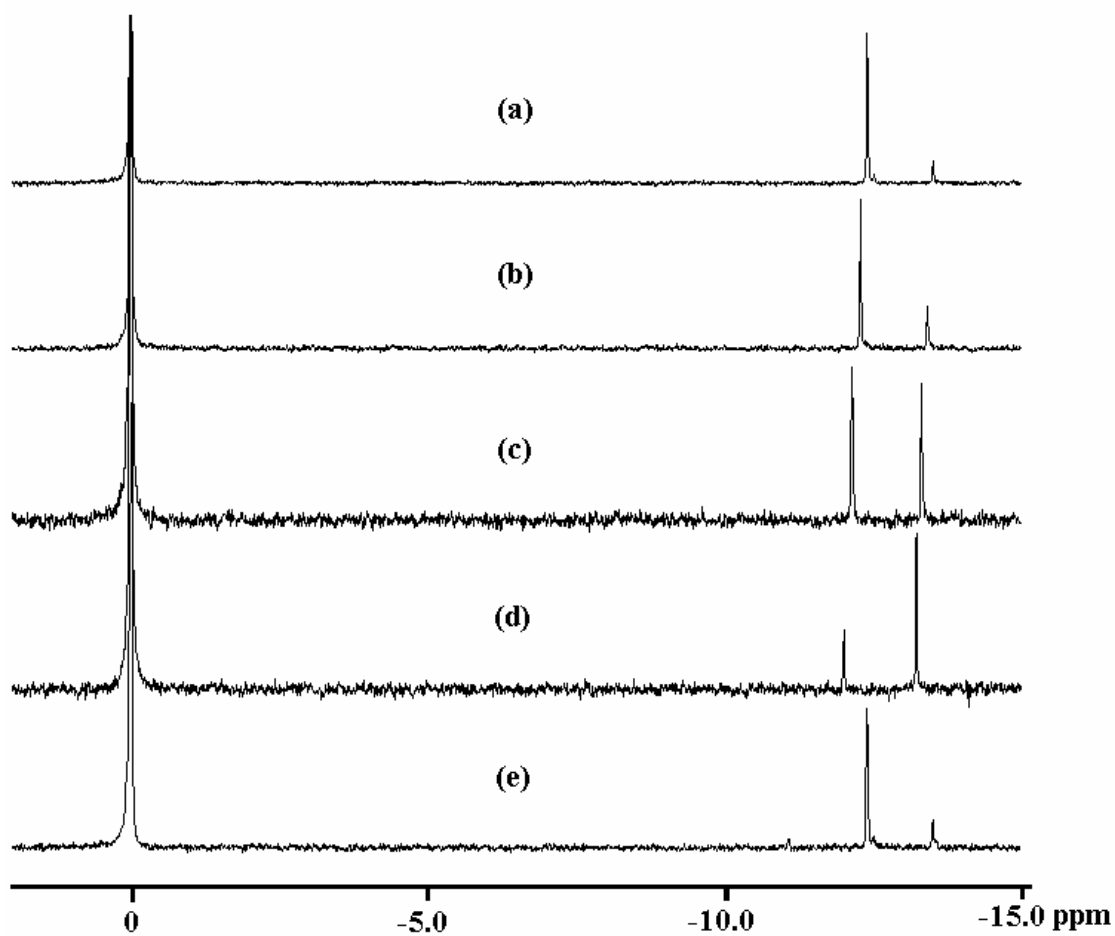

**Fig. S1** Temperature-dependent  $^{31}\text{P}$  NMR of **1** in  $\text{D}_2\text{O}$ : (a) at 23.7 °C, (b) at 39.7 °C, (c) at 58.9 °C, (d) at 79.7 °C, and (e) the solution of (d) remeasured at 24.7 °C.

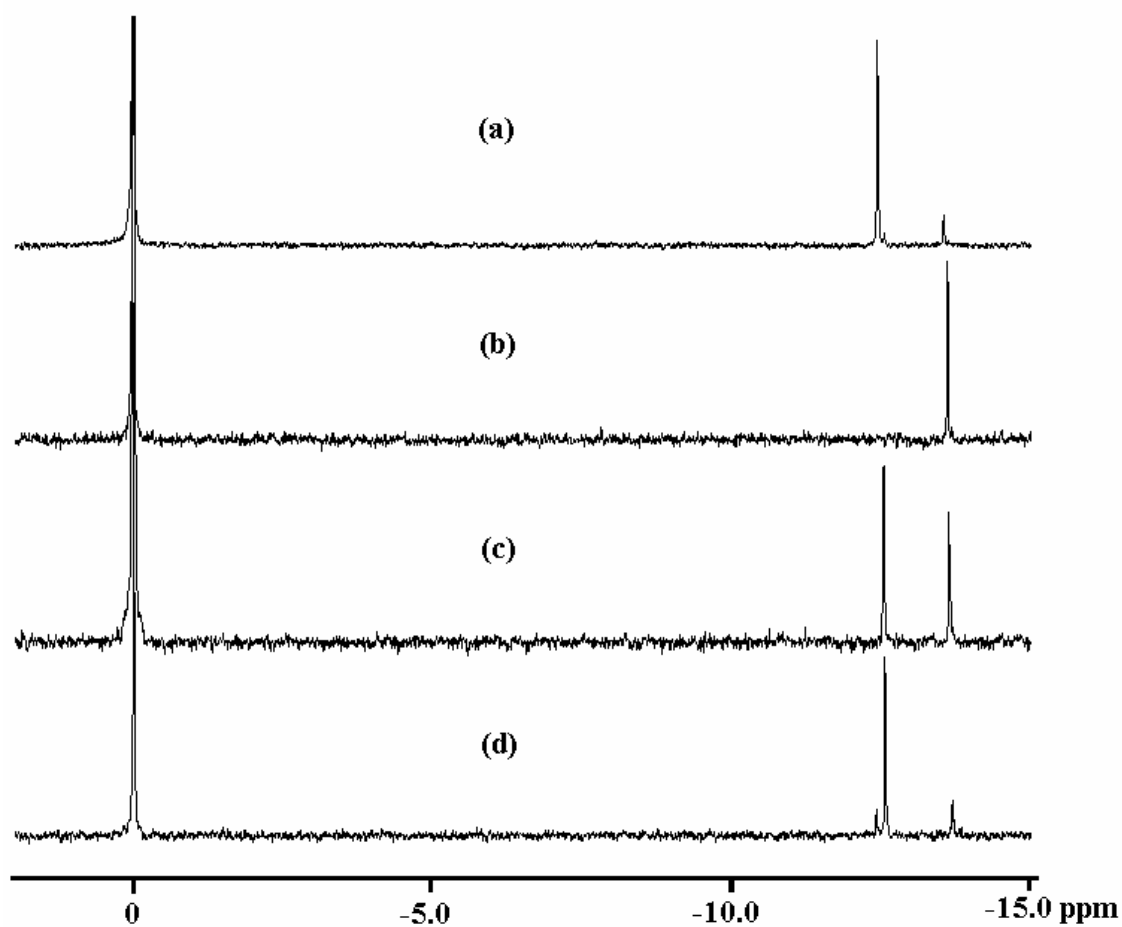

**Fig. S2** pH-Varied  $^{31}\text{P}$  NMR of **1** in  $\text{H}_2\text{O}$  at room temperature. The pH values of the solutions were adjusted by using aqueous KOH solution: (a) the aqueous solution of 1.0 g of **1** dissolved in 20 mL water, which showed  $\text{pH} = 1.77$ , (b) the solution (a) was adjusted to  $\text{pH} 2.5$  by adding the KOH solution, (c) the solution (b) was adjusted to  $\text{pH} 1.5$ , and (d) the solution (c) was adjusted to  $\text{pH} 0.5$ .

**Table S1** All bond distances (Å) and angles (°) for POM **1a**

| Distance (Å) |       |           |       |       |           |
|--------------|-------|-----------|-------|-------|-----------|
| atom         | atom  | distance  | atom  | atom  | distance  |
| C(1)         | O(1C) | 1.228(10) | C(1)  | O(2C) | 1.281(10) |
| C(1)         | C(2)  | 1.555(12) | C(2)  | O(3C) | 1.229(10) |
| C(2)         | O(4C) | 1.294(10) | C(3)  | O(5C) | 1.209(10) |
| C(3)         | O(6C) | 1.291(10) | C(3)  | C(4)  | 1.563(11) |
| C(4)         | O(7C) | 1.216(11) | C(4)  | O(8C) | 1.290(10) |
| O(1)         | Ti(1) | 2.137(6)  | O(2)  | W(1)  | 1.852(6)  |
| O(2)         | Ti(1) | 1.861(6)  | O(3)  | W(1)  | 1.703(6)  |
| O(4)         | W(2)  | 1.884(5)  | O(4)  | W(1)  | 1.901(5)  |
| O(5)         | W(2)  | 1.702(6)  | O(6)  | W(2)  | 1.850(6)  |
| O(6)         | Ti(2) | 1.861(6)  | O(7)  | Ti(2) | 2.131(6)  |
| O(8)         | Ti(2) | 1.813(6)  | O(8)  | Ti(1) | 1.833(6)  |
| O(9)         | W(8)  | 1.859(5)  | O(9)  | Ti(1) | 1.885(6)  |
| O(10)        | W(3)  | 1.910(5)  | O(10) | W(1)  | 1.936(6)  |
| O(11)        | W(4)  | 1.870(6)  | O(11) | W(1)  | 1.962(6)  |
| O(12)        | W(5)  | 1.906(6)  | O(12) | W(2)  | 1.952(6)  |
| O(13)        | W(6)  | 1.896(5)  | O(13) | W(2)  | 1.959(6)  |
| O(14)        | W(7)  | 1.867(6)  | O(14) | Ti(2) | 1.871(6)  |
| O(15)        | W(8)  | 1.701(6)  | O(16) | W(3)  | 1.893(6)  |
| O(16)        | W(8)  | 1.913(6)  | O(17) | W(3)  | 1.707(6)  |
| O(18)        | W(4)  | 1.921(6)  | O(18) | W(3)  | 1.926(5)  |
| O(19)        | W(4)  | 1.708(6)  | O(20) | W(4)  | 1.884(6)  |
| O(20)        | W(5)  | 1.924(6)  | O(21) | W(5)  | 1.700(6)  |
| O(22)        | W(5)  | 1.884(6)  | O(22) | W(6)  | 1.949(6)  |
| O(23)        | W(6)  | 1.710(6)  | O(24) | W(6)  | 1.870(6)  |
| O(24)        | W(7)  | 1.942(6)  | O(25) | W(7)  | 1.712(6)  |

| atom  | atom  | distance | atom  | atom  | distance |
|-------|-------|----------|-------|-------|----------|
| O(26) | W(7)  | 1.912(5) | O(26) | W(8)  | 1.928(6) |
| O(27) | P(1)  | 1.537(6) | O(27) | W(3)  | 2.416(6) |
| O(27) | W(1)  | 2.429(5) | O(27) | W(4)  | 2.501(5) |
| O(28) | P(1)  | 1.540(6) | O(28) | W(2)  | 2.416(5) |
| O(28) | W(6)  | 2.430(5) | O(28) | W(5)  | 2.499(6) |
| O(29) | P(1)  | 1.520(6) | O(29) | W(7)  | 2.347(6) |
| O(29) | W(8)  | 2.373(6) | O(30) | W(9)  | 1.870(6) |
| O(30) | W(8)  | 1.971(6) | O(31) | W(3)  | 1.906(6) |
| O(31) | W(9)  | 1.914(6) | O(32) | W(10) | 1.900(5) |
| O(32) | W(4)  | 1.929(6) | O(33) | W(10) | 1.897(6) |
| O(33) | W(5)  | 1.897(5) | O(34) | W(11) | 1.871(6) |
| O(34) | W(6)  | 1.930(6) | O(35) | W(11) | 1.891(5) |
| O(35) | W(7)  | 1.938(5) | O(36) | P(1)  | 1.545(6) |
| O(36) | W(10) | 2.417(5) | O(36) | W(11) | 2.417(6) |
| O(36) | W(9)  | 2.427(6) | O(37) | W(9)  | 1.716(6) |
| O(38) | W(10) | 1.918(6) | O(38) | W(9)  | 1.925(6) |
| O(39) | W(10) | 1.702(6) | O(40) | W(11) | 1.912(5) |
| O(40) | W(10) | 1.916(6) | O(41) | W(11) | 1.709(6) |
| O(42) | W(9)  | 1.907(6) | O(42) | W(11) | 1.939(6) |
| O(2C) | Ti(1) | 2.018(6) | O(4C) | Ti(1) | 2.073(6) |
| O(6C) | Ti(2) | 2.027(6) | O(8C) | Ti(2) | 2.089(6) |

## Angles (°)

| atom  | atom  | atom  | angle     | atom  | atom  | atom  | angle     |
|-------|-------|-------|-----------|-------|-------|-------|-----------|
| O(1C) | C(1)  | O(2C) | 126.3(8)  | O(1C) | C(1)  | C(2)  | 120.5(8)  |
| O(2C) | C(1)  | C(2)  | 113.2(7)  | O(3C) | C(2)  | O(4C) | 126.3(8)  |
| O(3C) | C(2)  | C(1)  | 121.0(7)  | O(4C) | C(2)  | C(1)  | 112.7(7)  |
| O(5C) | C(3)  | O(6C) | 125.5(8)  | O(5C) | C(3)  | C(4)  | 121.0(8)  |
| O(6C) | C(3)  | C(4)  | 113.5(7)  | O(7C) | C(4)  | O(8C) | 126.8(8)  |
| O(7C) | C(4)  | C(3)  | 120.7(7)  | O(8C) | C(4)  | C(3)  | 112.4(7)  |
| W(1)  | O(2)  | Ti(1) | 157.4(4)  | W(2)  | O(4)  | W(1)  | 151.6(3)  |
| W(2)  | O(6)  | Ti(2) | 156.4(4)  | Ti(2) | O(8)  | Ti(1) | 136.4(3)  |
| W(8)  | O(9)  | Ti(1) | 146.9(3)  | W(3)  | O(10) | W(1)  | 125.0(3)  |
| W(4)  | O(11) | W(1)  | 127.4(3)  | W(5)  | O(12) | W(2)  | 126.3(3)  |
| W(6)  | O(13) | W(2)  | 124.6(3)  | W(7)  | O(14) | Ti(2) | 146.2(3)  |
| W(3)  | O(16) | W(8)  | 153.5(3)  | W(4)  | O(18) | W(3)  | 125.4(3)  |
| W(4)  | O(20) | W(5)  | 153.4(3)  | W(5)  | O(22) | W(6)  | 126.1(3)  |
| W(6)  | O(24) | W(7)  | 154.0(3)  | W(7)  | O(26) | W(8)  | 123.5(3)  |
| P(1)  | O(27) | W(3)  | 126.4(3)  | P(1)  | O(27) | W(1)  | 126.7(3)  |
| W(3)  | O(27) | W(1)  | 89.53(18) | P(1)  | O(27) | W(4)  | 125.5(3)  |
| W(3)  | O(27) | W(4)  | 88.07(18) | W(1)  | O(27) | W(4)  | 88.34(18) |
| P(1)  | O(28) | W(2)  | 126.3(3)  | P(1)  | O(28) | W(6)  | 126.0(3)  |
| W(2)  | O(28) | W(6)  | 89.57(18) | P(1)  | O(28) | W(5)  | 126.1(3)  |
| W(2)  | O(28) | W(5)  | 88.90(18) | W(6)  | O(28) | W(5)  | 87.76(18) |
| P(1)  | O(29) | W(7)  | 127.6(3)  | P(1)  | O(29) | W(8)  | 127.2(3)  |
| W(7)  | O(29) | W(8)  | 91.55(19) | W(9)  | O(30) | W(8)  | 152.4(3)  |
| W(3)  | O(31) | W(9)  | 150.3(3)  | W(10) | O(32) | W(4)  | 150.6(3)  |
| W(10) | O(33) | W(5)  | 153.0(3)  | W(11) | O(34) | W(6)  | 150.5(3)  |
| W(11) | O(35) | W(7)  | 152.1(3)  | P(1)  | O(36) | W(10) | 129.3(3)  |
| P(1)  | O(36) | W(11) | 124.1(3)  | W(10) | O(36) | W(11) | 89.03(18) |
| P(1)  | O(36) | W(9)  | 123.9(3)  | W(10) | O(36) | W(9)  | 89.43(18) |
| W(11) | O(36) | W(9)  | 89.25(18) | W(10) | O(38) | W(9)  | 125.0(3)  |
| W(11) | O(40) | W(10) | 124.6(3)  | W(9)  | O(42) | W(11) | 124.4(3)  |

| atom  | atom  | atom  | angle    | atom  | atom  | atom  | angle    |
|-------|-------|-------|----------|-------|-------|-------|----------|
| C(1)  | O(2C) | Ti(1) | 118.1(5) | C(2)  | O(4C) | Ti(1) | 116.0(5) |
| C(3)  | O(6C) | Ti(2) | 117.1(5) | C(4)  | O(8C) | Ti(2) | 116.2(5) |
| O(29) | P(1)  | O(27) | 110.9(3) | O(29) | P(1)  | O(28) | 111.1(3) |
| O(27) | P(1)  | O(28) | 108.5(3) | O(29) | P(1)  | O(36) | 110.0(3) |
| O(27) | P(1)  | O(36) | 108.4(3) | O(28) | P(1)  | O(36) | 107.9(3) |
| O(8)  | Ti(1) | O(2)  | 98.4(3)  | O(8)  | Ti(1) | O(9)  | 100.1(3) |
| O(2)  | Ti(1) | O(9)  | 96.7(3)  | O(8)  | Ti(1) | O(2C) | 92.5(2)  |
| O(2)  | Ti(1) | O(2C) | 90.4(3)  | O(9)  | Ti(1) | O(2C) | 164.5(3) |
| O(8)  | Ti(1) | O(4C) | 166.9(3) | O(2)  | Ti(1) | O(4C) | 90.1(2)  |
| O(9)  | Ti(1) | O(4C) | 88.7(2)  | O(2C) | Ti(1) | O(4C) | 77.5(2)  |
| O(8)  | Ti(1) | O(1)  | 87.3(2)  | O(2)  | Ti(1) | O(1)  | 173.7(3) |
| O(9)  | Ti(1) | O(1)  | 84.8(2)  | O(2C) | Ti(1) | O(1)  | 86.7(2)  |
| O(4C) | Ti(1) | O(1)  | 83.8(2)  | O(8)  | Ti(2) | O(6)  | 97.6(3)  |
| O(8)  | Ti(2) | O(14) | 99.5(3)  | O(6)  | Ti(2) | O(14) | 97.9(3)  |
| O(8)  | Ti(2) | O(6C) | 93.6(2)  | O(6)  | Ti(2) | O(6C) | 89.0(3)  |
| O(14) | Ti(2) | O(6C) | 164.2(3) | O(8)  | Ti(2) | O(8C) | 168.6(2) |
| O(6)  | Ti(2) | O(8C) | 89.1(2)  | O(14) | Ti(2) | O(8C) | 88.6(2)  |
| O(6C) | Ti(2) | O(8C) | 77.3(2)  | O(8)  | Ti(2) | O(7)  | 88.7(2)  |
| O(6)  | Ti(2) | O(7)  | 172.2(3) | O(14) | Ti(2) | O(7)  | 85.4(2)  |
| O(6C) | Ti(2) | O(7)  | 86.1(2)  | O(8C) | Ti(2) | O(7)  | 83.9(2)  |
| O(3)  | W(1)  | O(2)  | 102.2(3) | O(3)  | W(1)  | O(4)  | 103.4(3) |
| O(2)  | W(1)  | O(4)  | 90.1(2)  | O(3)  | W(1)  | O(10) | 100.5(3) |
| O(2)  | W(1)  | O(10) | 88.7(2)  | O(4)  | W(1)  | O(10) | 155.7(2) |
| O(3)  | W(1)  | O(11) | 100.7(3) | O(2)  | W(1)  | O(11) | 156.8(2) |
| O(4)  | W(1)  | O(11) | 87.6(2)  | O(10) | W(1)  | O(11) | 84.0(2)  |
| O(3)  | W(1)  | O(27) | 170.2(2) | O(2)  | W(1)  | O(27) | 84.5(2)  |
| O(4)  | W(1)  | O(27) | 83.4(2)  | O(10) | W(1)  | O(27) | 72.4(2)  |
| O(11) | W(1)  | O(27) | 72.3(2)  | (5)   | W(2)  | O(6)  | 103.3(3) |
| O(5)  | W(2)  | O(4)  | 103.8(3) | O(6)  | W(2)  | O(4)  | 90.8(2)  |
| O(5)  | W(2)  | O(12) | 99.7(3)  | O(6)  | W(2)  | O(12) | 156.2(2) |



| atom  | atom | atom  | angle    | atom  | atom | atom  | angle    |
|-------|------|-------|----------|-------|------|-------|----------|
| O(4)  | W(2) | O(12) | 89.4(2)  | O(5)  | W(2) | O(13) | 99.1(2)  |
| O(6)  | W(2) | O(13) | 86.7(2)  | O(4)  | W(2) | O(13) | 157.0(2) |
| O(12) | W(2) | O(13) | 83.9(2)  | O(5)  | W(2) | O(28) | 169.2(2) |
| O(6)  | W(2) | O(28) | 83.4(2)  | O(4)  | W(2) | O(28) | 84.4(2)  |
| O(12) | W(2) | (28)  | 73.0(2)  | O(13) | W(2) | (28)  | 72.6(2)  |
| O(17) | W(3) | (16)  | 103.4(3) | O(17) | W(3) | (31)  | 103.0(3) |
| O(16) | W(3) | (31)  | 86.0(2)  | O(17) | W(3) | (10)  | 100.1(3) |
| O(16) | W(3) | (10)  | 90.5(2)  | O(31) | W(3) | (10)  | 156.8(2) |
| O(17) | W(3) | (18)  | 100.7(3) | O(16) | W(3) | (18)  | 155.9(2) |
| O(31) | W(3) | (18)  | 88.1(2)  | O(10) | W(3) | (18)  | 85.8(2)  |
| O(17) | W(3) | (27)  | 171.6(2) | O(16) | W(3) | (27)  | 81.9(2)  |
| O(31) | W(3) | (27)  | 83.7(2)  | O(10) | W(3) | (27)  | 73.1(2)  |
| O(18) | W(3) | (27)  | 74.2(2)  | O(19) | W(4) | (11)  | 103.2(3) |
| O(19) | W(4) | (20)  | 103.1(3) | O(11) | W(4) | (20)  | 90.6(3)  |
| O(19) | W(4) | (18)  | 101.0(3) | O(11) | W(4) | (18)  | 87.5(2)  |
| O(20) | W(4) | (18)  | 155.6(2) | O(19) | W(4) | (32)  | 101.9(3) |
| O(11) | W(4) | (32)  | 154.8(2) | O(20) | W(4) | (32)  | 85.2(2)  |
| O(18) | W(4) | (32)  | 86.2(2)  | O(19) | W(4) | (27)  | 171.6(2) |
| O(11) | W(4) | (27)  | 71.9(2)  | O(20) | W(4) | (27)  | 84.1(2)  |
| O(18) | W(4) | (27)  | 72.2(2)  | O(32) | W(4) | (27)  | 82.9(2)  |
| O(21) | W(5) | (22)  | 102.1(3) | O(21) | W(5) | (33)  | 103.9(3) |
| O(22) | W(5) | (33)  | 89.9(2)  | O(21) | W(5) | (12)  | 101.0(3) |
| O(22) | W(5) | (12)  | 88.3(2)  | O(33) | W(5) | (12)  | 154.9(2) |
| O(21) | W(5) | (20)  | 102.7(3) | O(22) | W(5) | (20)  | 155.2(2) |
| O(33) | W(5) | (20)  | 83.9(2)  | O(12) | W(5) | (20)  | 87.4(2)  |
| O(21) | W(5) | (28)  | 170.8(2) | O(22) | W(5) | (28)  | 72.7(2)  |
| O(33) | W(5) | (28)  | 83.9(2)  | O(12) | W(5) | (28)  | 71.7(2)  |
| O(20) | W(5) | (28)  | 82.8(2)  | O(23) | W(6) | (24)  | 102.7(3) |
| O(23) | W(6) | (13)  | 100.5(3) | O(24) | W(6) | (13)  | 93.1(2)  |
| O(23) | W(6) | (34)  | 103.3(3) | O(24) | W(6) | (34)  | 85.6(2)  |

| atom  | atom  | atom  | angle    | atom  | atom  | atom  | angle    |
|-------|-------|-------|----------|-------|-------|-------|----------|
| O(13) | W(6)  | (34)  | 155.8(2) | O(23) | W(6)  | (22)  | 102.3(3) |
| O(24) | W(6)  | (22)  | 154.8(2) | O(13) | W(6)  | (22)  | 85.2(2)  |
| O(34) | W(6)  | (22)  | 85.8(2)  | O(23) | W(6)  | (28)  | 172.5(2) |
| O(24) | W(6)  | (28)  | 82.1(2)  | O(13) | W(6)  | (28)  | 73.2(2)  |
| O(34) | W(6)  | (28)  | 82.7(2)  | O(22) | W(6)  | (28)  | 73.4(2)  |
| O(25) | W(7)  | (14)  | 100.3(3) | O(25) | W(7)  | (26)  | 100.4(3) |
| O(14) | W(7)  | (26)  | 92.2(2)  | O(25) | W(7)  | (35)  | 96.1(3)  |
| O(14) | W(7)  | (35)  | 162.5(2) | O(26) | W(7)  | (35)  | 90.6(2)  |
| O(25) | W(7)  | (24)  | 102.2(3) | O(14) | W(7)  | (24)  | 87.1(2)  |
| O(26) | W(7)  | (24)  | 157.1(2) | O(35) | W(7)  | O(24) | 83.6(2)  |
| O(25) | W(7)  | O(29) | 172.6(2) | O(14) | W(7)  | O(29) | 83.4(2)  |
| O(26) | W(7)  | O(29) | 72.9(2)  | O(35) | W(7)  | O(29) | 81.0(2)  |
| O(24) | W(7)  | O(29) | 84.3(2)  | O(15) | W(8)  | O(9)  | 100.4(3) |
| O(15) | W(8)  | O(16) | 102.0(3) | O(9)  | W(8)  | O(16) | 89.8(2)  |
| O(15) | W(8)  | O(26) | 100.7(3) | O(9)  | W(8)  | O(26) | 91.6(2)  |
| O(16) | W(8)  | O(26) | 156.6(2) | O(15) | W(8)  | O(30) | 96.5(3)  |
| O(9)  | W(8)  | O(30) | 162.8(2) | O(16) | W(8)  | O(30) | 83.7(2)  |
| O(26) | W(8)  | O(30) | 88.3(2)  | O(15) | W(8)  | O(29) | 172.0(2) |
| O(9)  | W(8)  | O(29) | 83.3(2)  | O(16) | W(8)  | O(29) | 85.0(2)  |
| O(26) | W(8)  | O(29) | 72.0(2)  | O(30) | W(8)  | O(29) | 80.4(2)  |
| O(37) | W(9)  | O(30) | 103.1(3) | O(37) | W(9)  | O(42) | 101.8(3) |
| O(30) | W(9)  | O(42) | 90.5(2)  | O(37) | W(9)  | O(31) | 101.6(3) |
| O(30) | W(9)  | O(31) | 86.6(2)  | O(42) | W(9)  | O(31) | 156.5(2) |
| O(37) | W(9)  | O(38) | 100.9(3) | O(30) | W(9)  | O(38) | 155.9(2) |
| O(42) | W(9)  | O(38) | 86.2(2)  | O(31) | W(9)  | O(38) | 86.9(2)  |
| O(37) | W(9)  | O(36) | 171.8(2) | O(30) | W(9)  | O(36) | 83.6(2)  |
| O(42) | W(9)  | O(36) | 73.3(2)  | O(31) | W(9)  | O(36) | 83.2(2)  |
| O(38) | W(9)  | O(36) | 72.6(2)  | O(39) | W(10) | O(33) | 103.8(3) |
| O(39) | W(10) | O(32) | 101.9(3) | O(33) | W(10) | O(32) | 85.9(2)  |
| O(39) | W(10) | O(40) | 101.7(3) | O(33) | W(10) | O(40) | 89.4(2)  |

| atom  | atom  | atom  | angle    | atom  | atom  | atom  | angle    |
|-------|-------|-------|----------|-------|-------|-------|----------|
| O(32) | W(10) | O(40) | 156.3(2) | O(39) | W(10) | O(38) | 100.0(3) |
| O(33) | W(10) | O(38) | 156.2(2) | O(32) | W(10) | O(38) | 88.4(2)  |
| O(40) | W(10) | O(38) | 86.7(2)  | O(39) | W(10) | O(36) | 171.2(2) |
| O(33) | W(10) | O(36) | 83.5(2)  | O(32) | W(10) | O(36) | 83.3(2)  |
| O(40) | W(10) | O(36) | 73.1(2)  | O(38) | W(10) | O(36) | 72.9(2)  |
| O(41) | W(11) | O(34) | 102.6(3) | O(41) | W(11) | O(35) | 101.2(3) |
| O(34) | W(11) | O(35) | 87.5(2)  | O(41) | W(11) | O(40) | 103.2(3) |
| O(34) | W(11) | O(40) | 90.2(2)  | O(35) | W(11) | O(40) | 155.4(2) |
| O(41) | W(11) | O(42) | 100.3(3) | O(34) | W(11) | O(42) | 157.0(2) |
| O(35) | W(11) | O(42) | 87.4(2)  | O(40) | W(11) | O(42) | 85.3(2)  |
| O(41) | W(11) | O(36) | 172.5(2) | O(34) | W(11) | O(36) | 84.1(2)  |
| O(35) | W(11) | O(36) | 82.2(2)  | O(40) | W(11) | O(36) | 73.2(2)  |
| O(42) | W(11) | O(36) | 73.0(2)  |       |       |       |          |

**Table S2** Average bond distances (Å) and angles (°) [range] for the Keggin POM moiety in **1a**

---

|                                           |                             |
|-------------------------------------------|-----------------------------|
| W-Ot (Ot : terminal oxygen)               | 1.707 [1.700(6) – 1.716(6)] |
| W-Oc (Oc : corner sharing oxygen)         | 1.908 [1.870(6) – 1.971(6)] |
| W-Oe (Oe : edge-sharing oxygen)           | 1.922 [1.870(6) – 1.962(6)] |
| W-Oa (Oa : oxygen coordinated to P atom)  | 2.425 [2.347(6) – 2.501(5)] |
| W-Ob (Ob : oxygen coordinated to Ti atom) | 1.857 [1.850(6) – 1.867(6)] |
| <br>                                      |                             |
| P-O distance                              | 1.534 [1.520(6) - 1.545(6)] |
| O-P-O angles                              | 109.5 [107.9(3) – 111.1(3)] |

---

**Table S3** Bond valence sum (BVS) calculations of W(1-11), Ti(1-2), P and O atoms

---

|                                       |       |       |       |       |       |
|---------------------------------------|-------|-------|-------|-------|-------|
| W(1)                                  | 6.105 | W(7)  | 6.092 |       |       |
| W(2)                                  | 6.143 | W(8)  | 6.101 |       |       |
| W(3)                                  | 6.116 | W(9)  | 6.123 |       |       |
| W(4)                                  | 6.150 | W(10) | 6.150 |       |       |
| W(5)                                  | 6.165 | W(11) | 6.174 |       |       |
| W(6)                                  | 6.075 |       |       |       |       |
| W(1-11) average = 6.127 [6.075-6.174] |       |       |       |       |       |
| Ti(1)                                 | 4.159 | Ti(2) | 4.215 |       |       |
| Ti(1-2) average = 4.187 [4.159-4.215] |       |       |       |       |       |
| P(1)                                  | 4.987 |       |       |       |       |
| O(1)                                  | 0.419 | O(18) | 1.965 | O(35) | 2.018 |
| O(2)                                  | 2.075 | O(19) | 1.759 | O(36) | 1.985 |
| O(3)                                  | 1.783 | O(20) | 2.074 | O(37) | 1.722 |
| O(4)                                  | 2.137 | O(21) | 1.798 | O(38) | 1.976 |
| O(5)                                  | 1.788 | O(22) | 2.010 | O(39) | 1.788 |
| O(6)                                  | 2.082 | O(23) | 1.750 | O(40) | 2.017 |
| O(7)                                  | 0.426 | O(24) | 2.070 | O(41) | 1.754 |
| O(8)                                  | 1.958 | O(25) | 1.740 | O(42) | 1.969 |
| O(9)                                  | 1.998 | O(26) | 1.985 | O(1C) |       |
| O(10)                                 | 1.969 | O(27) | 1.958 | O(2C) |       |
| O(11)                                 | 2.020 | O(28) | 1.948 | O(3C) |       |
| O(12)                                 | 1.940 | O(29) | 1.905 | O(4C) |       |
| O(13)                                 | 1.951 | O(30) | 1.999 | O(5C) |       |
| O(14)                                 | 2.005 | O(31) | 2.038 | O(6C) |       |
| O(15)                                 | 1.793 | O(32) | 2.015 | O(7C) |       |
| O(16)                                 | 2.078 | O(33) | 2.112 | O(8C) |       |
| O(17)                                 | 1.764 | O(34) | 2.097 |       |       |

---
